# Supplementary material for: Novel Soil Bacterium Strain Desulfitobacterium sp. PGC-3-9 Detoxifies Trichothecene Mycotoxins in Wheat via De-Epoxidation under Aerobic and Anaerobic Conditions
Source: MDPI journal article supplement (doi:10.3390/toxins12060363), 2020-06-01
Supplement: s1 [file s1]

# Supplementary Materials: Novel Soil Bacterium Strain Desulfitobacterium sp. PGC-3-9 Detoxifies Trichothecene Mycotoxins in Wheat via De-Epoxidation under Aerobic and Anaerobic Conditions

Wei-Jie He, Meng-Meng Shi, Peng Yang, Tao Huang, Qing-Song Yuan, Shu-Yuan Yi, Ai-Bo Wu, He-Ping Li, Chun-Bao Gao, Jing-Bo Zhang and Yu-Cai Liao

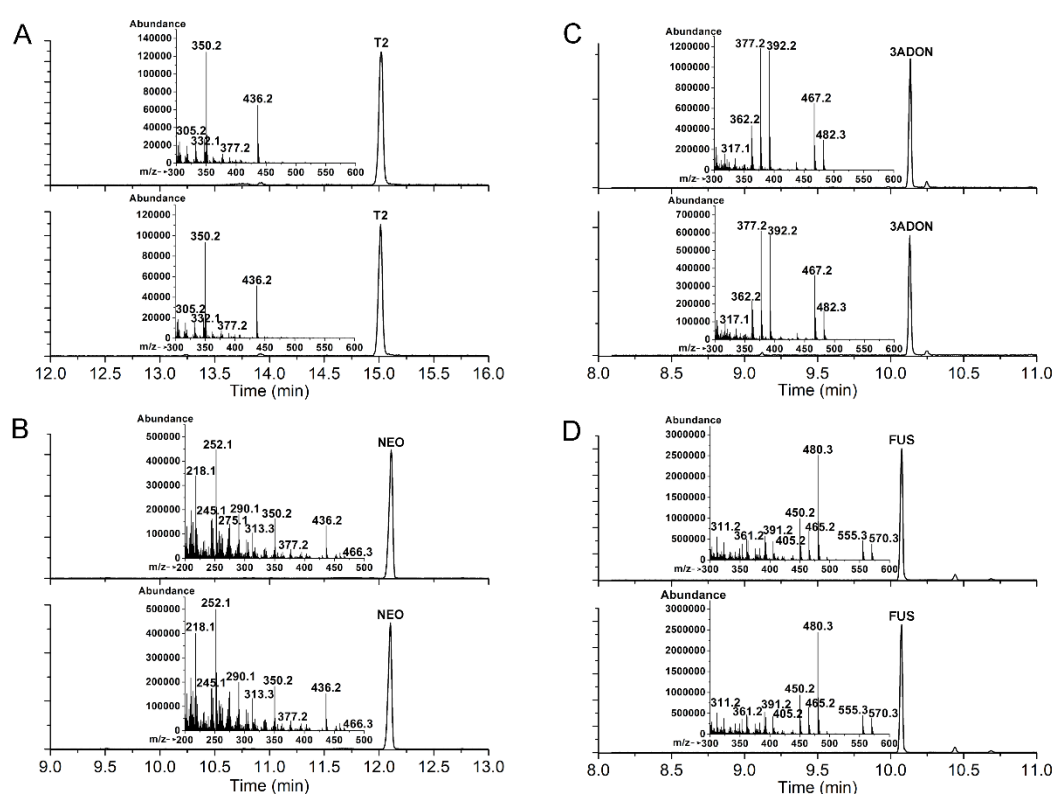

**Figure S1.** GC-MS chromatography of trichothecene mycotoxins before and after incubation with strain PGC-3-9. (A–D) GC-MS chromatography of trichothecenes T2 (A), neosolaniol (B; NEO), 3-Acetyl deoxynivalenol (C; 3ADON) and Fusarenon X (D; FUS) before and after incubation with PGC-3-9. Total ion chromatograms and mass spectra of each trichothecene mycotoxin before (upper panel) and after (lower panel) incubation with PGC-3-9. Detailed mass spectra of mycotoxins before and after incubation are illustrated as small charts within the upper and lower panels.
